# Supplementary material for: Cfp1 is required for gene expression-dependent H3K4 trimethylation and H3K9 acetylation in embryonic stem cells
Source: PubMed Central journal article supplement (PMC4189735; doi:10.1186/s13059-014-0451-x), 2014-09-04

Clouaire et al. **Additional File 13 Figure S8.**

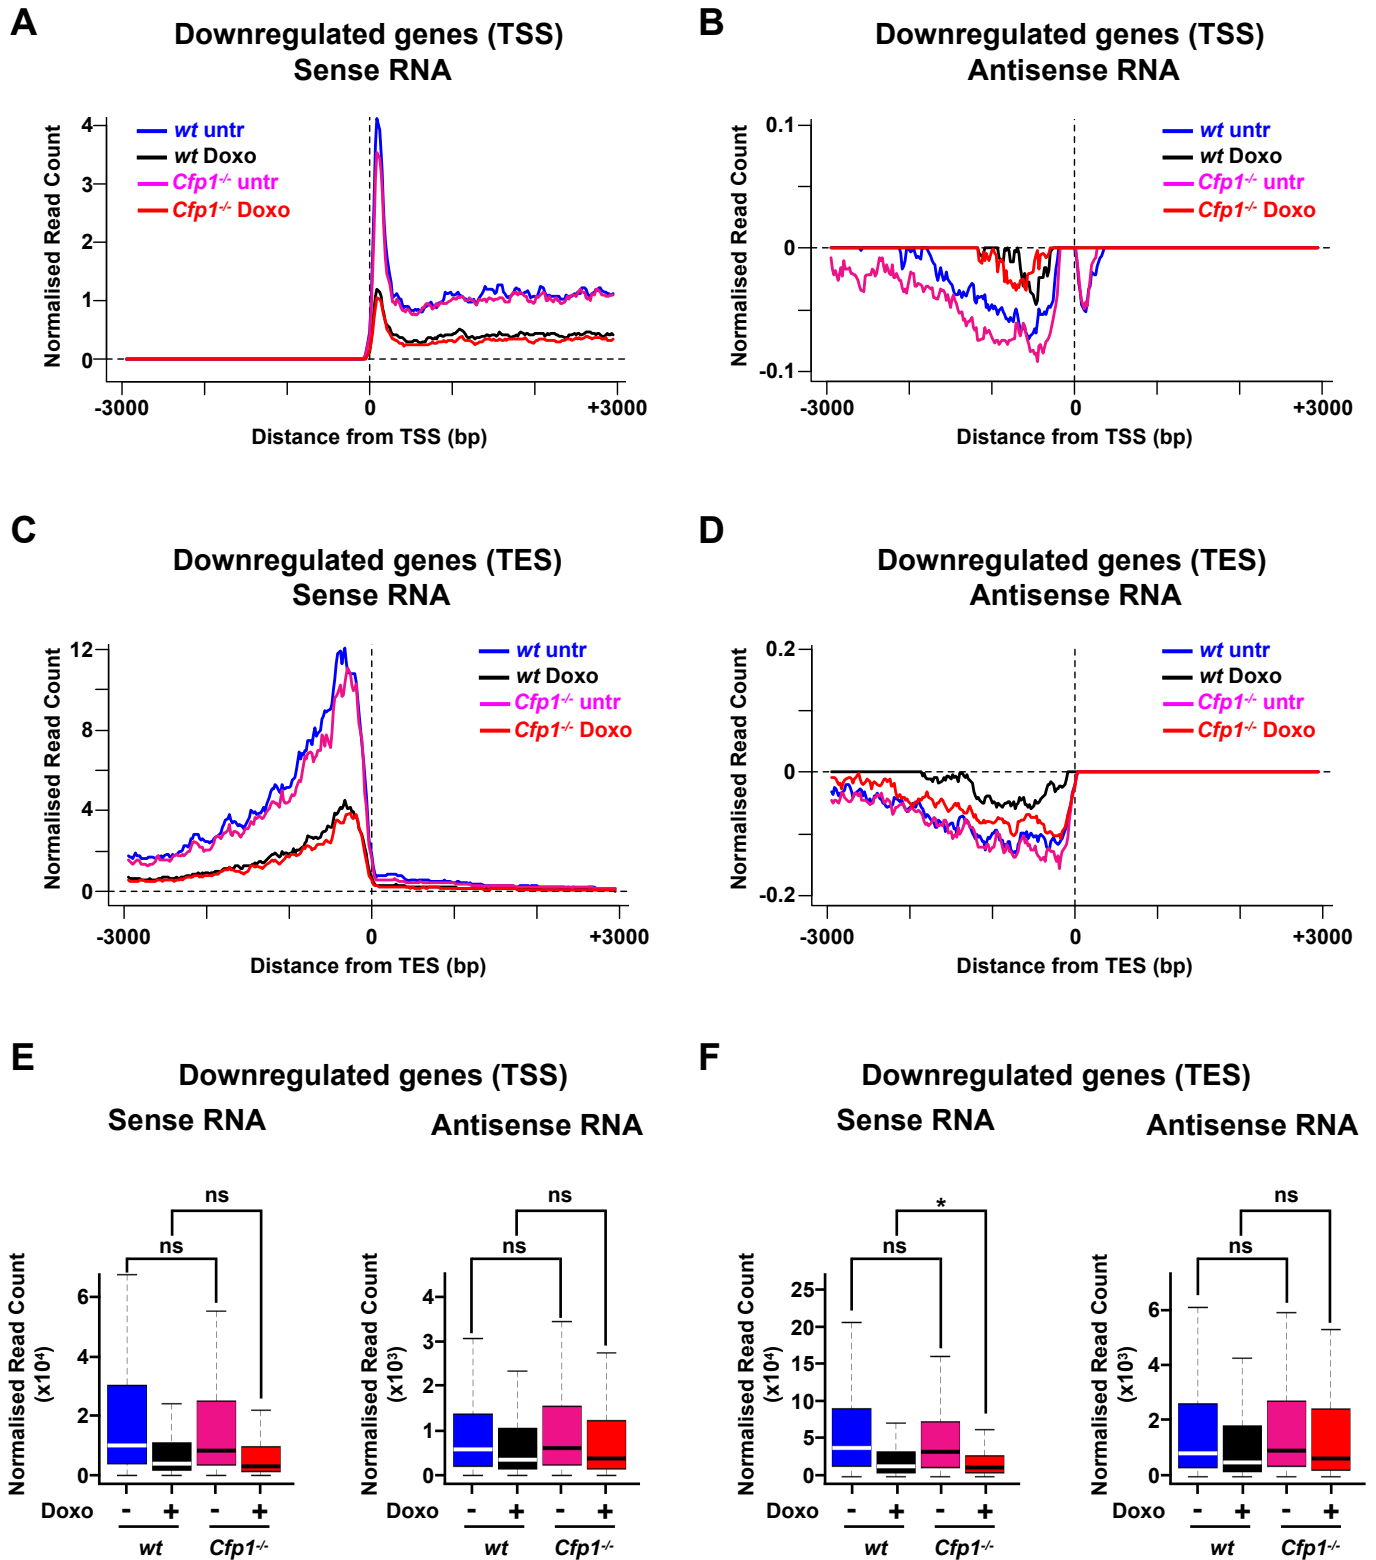

Supplement: 13059_2014_451_MOESM13_ESM.pdf [file 13059_2014_451_MOESM13_ESM.pdf]
