# Supplementary material for: Cfp1 is required for gene expression-dependent H3K4 trimethylation and H3K9 acetylation in embryonic stem cells
Source: PubMed Central journal article supplement (PMC4189735; doi:10.1186/s13059-014-0451-x), 2014-09-04
Supplement: 13059_2014_451_MOESM14_ESM.pdf [file 13059_2014_451_MOESM14_ESM.pdf]

**Additional file 14: Table S6. List of antibodies used in the study**

|            |                |           |
|------------|----------------|-----------|
| H3K4me3    | Abcam          | ab8580.   |
| H3K9,K14ac | Millipore      | 06-599    |
| H3K27ac    | Abcam          | ab4729    |
| H3K9ac     | Millipore      | 06-942    |
| H3K14ac    | Millipore      | 07-353    |
| H3         | Abcam          | ab1791    |
| P53S18P    | Cell Signaling | 9248L     |
| RNA pol II | Santa Cruz     | sc-899    |
| GCN5       | Santa Cruz     | Sc-20698X |
| HDAC1      | Abcam          | ab7028    |
| P53        | Santa Cruz     | Sc-126    |
| TBP        | Abcam          | ab28175   |
