# Supplementary material for: Cfp1 is required for gene expression-dependent H3K4 trimethylation and H3K9 acetylation in embryonic stem cells
Source: PubMed Central journal article supplement (PMC4189735; doi:10.1186/s13059-014-0451-x), 2014-09-04
Supplement: 13059_2014_451_MOESM15_ESM.pdf [file 13059_2014_451_MOESM15_ESM.pdf]

**Additional file 15: Table S7. List of Oligonucleotides used in the study**

ChIP

|              |          |   |                         |
|--------------|----------|---|-------------------------|
| Cdkn1a (p21) | TSS1     | F | TGTGACATGTATCAGGTGAAGGA |
|              |          | R | TGAATGTATAGTCAGGCACACCA |
|              | TSS2     | F | GCGCAGATCCACAGCGATA     |
|              |          | R | CGGGCACGCACAAATACAC     |
|              | Intron 1 | F | GTGGCCCTTGAGAGACAAGGT   |
|              |          | R | GGACTCGGCTAAGGCTGGAT    |
|              | Exon 2   | F | GTCGCTGTCTTGCACTCTGG    |
|              |          | R | AAGGCCATCCTCAAATGGTG    |
|              | 3'UTR    | F | CCTGGTTCCTTGCCACTTCTT   |
|              |          | R | GCCATCCCTGTTCTAGGCTGT   |
| ActB         | TSS      | F | TCAGGACCCTGCAGTGAGGT    |
|              |          | R | ACACCCGCCACCAGGTAAG     |
| Gapdh        | TSS      | F | TTCGCACCAGCATCCCTAGA    |
|              |          | R | TCTTGTGCAGTGCCAGGTGA    |
| Intergenic   | chr15    | F | GGGACGGGAACAAATGATGA    |
|              |          | R | GACTGCCGTTCTTTGCTTGG    |
| Intergenic   | chr5     | F | GTGGCTGACACTGTGCTGCT    |
|              |          | R | GGCTGTTTGCCTCCTCTGTC    |

RTqPCR

|               |   |                           |
|---------------|---|---------------------------|
| Cdkn1a (p21)  | F | CCTGGTGATGTCCGACCTGTT     |
|               | R | GGGGAATCTTCAGGCCGCTC      |
| Mdm2          | F | CAGCTTCGGAACAAGAGACTC     |
|               | R | CTGCTCTCACTCAGCGATGT      |
| pou5f1(Oct4)  | F | ATGAAAGCCCTGCAGAAGGAG     |
|               | R | ACAGATGGTGGTCTGGCTGAA     |
| Nanog         | F | AACCAAAGGATGAAGTGCAAGC    |
|               | R | TGCAATGGATGCTGGGATACT     |
| Sox2          | F | TCGTGGTCTTGTTTAAGGCAA     |
|               | R | AATTACCAACGATATCAACCTGCAT |
| ActB          | F | TGACGGCCAGGTCATCACT       |
|               | R | AGTTTCATGGATGCCACAGGA     |
| Gapdh         | F | GCCATGTAGGCCATGAGGTC      |
|               | R | CCAGGTTGTCTCCTGCGACT      |
| Lmna (LaminA) | F | GCTTCCCACCGAAGTTCACC      |
|               | R | GTGTTCTGCGCCTTCCACAC      |
| ERCC-00130    | F | ACGGGACAAGGGATCAACCT      |
|               | R | GGCGAATGACAGTGGAAAGC      |
| ERCC-00096    | F | CGCAGACGGTATCAACAGGA      |
|               | R | TGGACACTGCATCGGAAGAC      |
| ERCC-00074    | F | GCTTCCCATCTTCTTTGAGAGTTG  |
|               | R | CCAATTGGAGCTTTCTTAGCTGTC  |

## Splicing

|           |   |                          |
|-----------|---|--------------------------|
| Splice 1  | F | GTGAGGAGGAGCATGAATGG     |
|           | R | CGAAGAGACAACGGCACACTTT   |
| Splice 2  | F | GTGTCAGAGTCTAGGGGAATTGGA |
|           | R | GAACAGGTCGGACATCACCAG    |
| Splice 3  | F | GCCTTGTGCTGTCTTGAC       |
|           | R | AAGAGGCCTCCTGACCCACA     |
| Unspliced | F | GTGGCCCTTGAGAGACAAGGT    |
|           | R | GGACTCGGCTAAGGCTGGAT     |
| Total RNA | F | CCTGGTTCCTTGCCACTTCTT    |
|           | R | GCCATCCCTGTTCTAGGCTGT    |
